# Supplementary material for: An Update on the Implications of New Psychoactive Substances in Public Health
Source: MDPI journal article supplement (doi:10.3390/ijerph19084869), 2022-04-17
Supplement: s1 [file s1]

### Supplementary Material:

**Table S1.** Classification of piperazines

| Family             | Compound                                                                                                  |
|--------------------|-----------------------------------------------------------------------------------------------------------|
| Benzyl piperazines | BZP( <i>N</i> -benzylpiperazine)                                                                          |
|                    | 2C-B-BZP                                                                                                  |
|                    | MDBP/MDBZP (1-(3,4-methylenedioxybenzyl)piperazine)- methylene-deoxy analogue of BZP, Piperonylpiperazine |
|                    | FBZP (1-(4-fluorobenzyl)-piperazine)                                                                      |
|                    | MBZP (1-(4-methylbenzyl)-piperazine)                                                                      |
|                    | DBZP (1,4-dibenzylpiperazina)                                                                             |
| Phenyl piperazines | mCPP (1-(3-chlorophenyl)piperazine)                                                                       |
|                    | pCPP 1-(4-Chlorophenyl)piperazine)                                                                        |
|                    | mCPCPP (1-(3-Chlorophenyl)-4-(3-chloropropyl)piperazine)                                                  |
|                    | TFMPP (1-(3-trifluoromethylphenyl)piperazine)                                                             |
|                    | 1- TFMPP                                                                                                  |
|                    | 2- TFMPP                                                                                                  |
|                    | 3- TFMPP                                                                                                  |
|                    | 4- TFMPP                                                                                                  |
|                    | MePP (1-methyl-3-phenylpiperazine)                                                                        |
|                    | MeBP (1-(3-methylbenzyl)piperazine)                                                                       |
|                    | pMeOPP (1-(4- methoxyphenyl)piperazine)                                                                   |
|                    | oMeOPP (1-(2-Methoxyphenyl)piperazine)                                                                    |
|                    | pFPP (1-(4-fluorophenyl)-piperazine)                                                                      |
|                    | DCPP (2,3-dichlorophenylpiperazine)                                                                       |
|                    | mMPP (1-(3-Methylphenyl)piperazine)                                                                       |
|                    | pMPP (1-(4-Methylphenyl)piperazine)                                                                       |

**Table S2.** Intoxications with piperazines.

| <b>Age/sex</b>                | <b>Quantity ingested</b>     | <b>Compound detected in the toxicological screening</b> | <b>Sample</b>        | <b>Reference</b> |
|-------------------------------|------------------------------|---------------------------------------------------------|----------------------|------------------|
| 16, Female                    | 4 tablets                    | BZP                                                     | n.a                  | [1]              |
| 17, Male                      | 5 tablets                    | n.a                                                     | Serum, urine         | [2]              |
| 18, Female                    | n.a                          | BZP                                                     | n.a                  | [1]              |
| 18, Female                    | 4 tablets                    | BZP (260–270 ng/mL),<br>TFMPP (30–60 ng/mL)             | Serum                | [3]              |
| 18, Female                    | 4 tablets                    |                                                         |                      |                  |
| 19, Male                      | 4 tablets                    |                                                         |                      |                  |
| 19, Female                    | n.a                          | BZP (0.20 mg/L) and metabolites                         | Plasma, urine, blood | [4]              |
| 20, Male                      | 3 – 4 tablets                | BZP                                                     | Blood                | [5]              |
| 22, Male                      | 3 – 4 tablets                | BZP (2.23 mg/L),<br>MDMA (1.05 mg/L)                    | Plasma               | [4]              |
| 23, Female                    | n.a                          | BZP                                                     | Serum, plasma        | [6]              |
| 25, Male                      | 4 tablets                    | BZP                                                     | n.a                  | [1]              |
| 29, Female                    | 3 tablets                    | mCPP (320 ng/mL)                                        | Plasma               | [7]              |
|                               |                              | mCPP (2300 ng/mL)                                       | Urine                |                  |
| 88 patients,<br>15 – 42 years | aproximately<br>3.89 tablets | BZP                                                     | Plasma               | [8]              |
| 7 patients,<br>18 – 23 years  | 3 – 9 tablets                | BZP (1.3, 1.9, 1.9, and 2.5 mg/L)                       | Serum                | [9]              |

n.a.: not available

**Table S3.** Examples of natural and synthetic tryptamines

| TRYPTAMINES                               |              |                                                                 |                                                                                       |
|-------------------------------------------|--------------|-----------------------------------------------------------------|---------------------------------------------------------------------------------------|
| Commum Name                               | Abbreviation | Molecular formula                                               | Chemical Structure                                                                    |
| Natural Origin Tryptamines                |              |                                                                 |                                                                                       |
| Dimethyltryptamine                        | DMT          | C <sub>12</sub> H <sub>16</sub> N <sub>2</sub>                  | 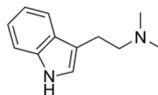   |
| Psilocybin                                |              | C <sub>12</sub> H <sub>17</sub> N <sub>2</sub> O <sub>4</sub> P |    |
| Psilocin                                  | 4-OH-DMT     | C <sub>12</sub> H <sub>16</sub> N <sub>2</sub> O                |   |
| 5-Methoxy- <i>N,N</i> -dimethyltryptamine | 5-MeO-DMT    | C <sub>13</sub> H <sub>18</sub> N <sub>2</sub> O                |  |
| 5-Hydroxy- <i>N,N</i> -dimethyltryptamine | Bufotenine   | C <sub>12</sub> H <sub>16</sub> N <sub>2</sub> O                |  |
| Tryptamines of Synthetic Origin           |              |                                                                 |                                                                                       |
| $\alpha$ -methyltryptamine                | $\alpha$ -MT | C <sub>11</sub> H <sub>14</sub> N <sub>2</sub>                  |  |
| $\alpha$ -ethyltryptamine                 | $\alpha$ -ET | C <sub>12</sub> H <sub>16</sub> N <sub>2</sub>                  |  |
| <i>N,N</i> -diallyltryptamine             | DALT         | C <sub>16</sub> H <sub>19</sub> N <sub>2</sub>                  |  |
| Dipropyltryptamine                        | DPT          | C <sub>16</sub> H <sub>24</sub> N <sub>2</sub>                  |  |
| <i>N</i> -methyltryptamine                | NMT          | C <sub>11</sub> H <sub>14</sub> N <sub>2</sub>                  |  |
| Diisopropyltryptamine                     | DiPT         | C <sub>16</sub> H <sub>24</sub> N <sub>2</sub>                  |  |
| Diethyltryptamine                         | DETECTIVE    | C <sub>14</sub> H <sub>20</sub> N <sub>2</sub>                  |  |

|                                                         |                     |                                                               |                                                                                       |
|---------------------------------------------------------|---------------------|---------------------------------------------------------------|---------------------------------------------------------------------------------------|
| <i>N</i> -methyl- <i>N</i> ethyltryptamine              | MET                 | C <sub>13</sub> H <sub>18</sub> N <sub>2</sub>                | 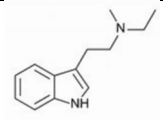   |
| 4-acetoxy- <i>N,N</i> -diethyltryptamine                | 4-AcO-DET           | C <sub>16</sub> H <sub>22</sub> N <sub>2</sub> O <sub>2</sub> |    |
| 4-Acetoxy- <i>N</i> -methyl- <i>N</i> -ethyltryptamine  | 4-AcO-MET           | C <sub>15</sub> H <sub>20</sub> N <sub>2</sub> O <sub>2</sub> |    |
| 4-Acetoxy- <i>N,N</i> -dipropyltryptamine               | 4-AcO-DPT           | C <sub>18</sub> H <sub>26</sub> N <sub>2</sub> O <sub>2</sub> |    |
| 4-Acetyloxy- <i>N,N</i> -diallyltryptamine              | 4-AcO-DALT          | C <sub>18</sub> H <sub>22</sub> N <sub>2</sub> O <sub>2</sub> |    |
| 4-acetoxi- <i>N,N</i> -diisopropyltryptamine            | 4-AcO-DiPT          | C <sub>18</sub> H <sub>26</sub> N <sub>2</sub> O <sub>2</sub> |    |
| 4-Hydroxy- <i>N</i> -methyl- <i>N</i> -ethyltryptamine  | 4-OH-MET            | C <sub>13</sub> H <sub>18</sub> N <sub>2</sub> O              |   |
| 4-hydroxy- <i>N,N</i> -diisopropyltryptamine            | 4-OH-DiPT           | C <sub>16</sub> H <sub>24</sub> N <sub>2</sub> O              |  |
| 4-Hydroxy- <i>N,N</i> -dipropyltryptamine               | 4-OH-DPT            | C <sub>16</sub> H <sub>24</sub> N <sub>2</sub> O              |  |
| 4-hydroxy- <i>N,N</i> -diethyltryptamine                | 4-OH-DET            | C <sub>14</sub> H <sub>20</sub> N <sub>2</sub> O              |  |
| 4-hydroxy- <i>N</i> -methyl- <i>N</i> -isopiltryptaline | 4-OH-MiPT           | C <sub>14</sub> H <sub>20</sub> N <sub>2</sub> O              |  |
| 5-Methoxy- <i>N,N</i> -diallyltryptamine                | 5-MeO-DALT          | C <sub>17</sub> H <sub>22</sub> N <sub>2</sub> O              |  |
| 5-Methoxy- <i>N,N</i> -diethyltryptamine                | 5-MeO-DET           | C <sub>15</sub> H <sub>22</sub> N <sub>2</sub> O              |  |
| 5-Methoxy- $\alpha$ -methyltryptamine                   | 5-MeO- $\alpha$ -MT | C <sub>12</sub> H <sub>16</sub> N <sub>2</sub> O              |  |

|                                                                     |                              |                                                  |                                                                                       |
|---------------------------------------------------------------------|------------------------------|--------------------------------------------------|---------------------------------------------------------------------------------------|
| 5-Methoxy- <i>N</i> -methyl- <i>N</i> -ethyltryptamine              | 5-MeO-MET                    | C <sub>14</sub> H <sub>20</sub> N <sub>2</sub> O | 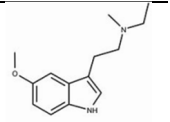   |
| 5-Methoxy- <i>N,N</i> -diisopropyltryptamine                        | 5-MeO-DiPT<br>"Foxy Methoxy" | C <sub>17</sub> H <sub>26</sub> N <sub>2</sub> O |    |
| 5-Methoxy- <i>N,N</i> -dipropyltryptamine                           | 5-MeO-DPT                    | C <sub>17</sub> H <sub>26</sub> N <sub>2</sub> O |    |
| 5-methoxy- <i>N,N</i> -dimethyltryptamine                           | 5-MeO-DMT                    | C <sub>13</sub> H <sub>18</sub> N <sub>2</sub> O |    |
| 5-methoxy- <i>N</i> -methyl- <i>N</i> -isopropyltryptamine          | 5-MeO-MiPT<br>"Moxy"         | C <sub>15</sub> H <sub>22</sub> N <sub>2</sub> O |    |
| 5-Methoxy- <i>N,N</i> -diethyltryptamine                            | 5-MeO-DET                    | C <sub>15</sub> H <sub>22</sub> N <sub>2</sub>   |    |
| 5-Methoxy- <i>N,N</i> -trimethyltryptamine                          | 5-MeO-TMT                    | C <sub>14</sub> H <sub>20</sub> N <sub>2</sub> O |   |
| <b>Ergolines</b>                                                    |                              |                                                  |                                                                                       |
| (8β)-9,10-Didehydro-6-methyl-ergoline-8-carboxamide                 | LSA                          | C <sub>16</sub> H <sub>17</sub> N <sub>3</sub> O |  |
| 9,10-didehydro- <i>N,N</i> -diethyl-6-methylergoline-8β-carboxamide | LSD                          | C <sub>20</sub> H <sub>25</sub> N <sub>3</sub> O |  |

**Table S4.** Classes of SCRA and their chemical characterization

| Category                   | Structure                                                               | Examples of compounds                                                |
|----------------------------|-------------------------------------------------------------------------|----------------------------------------------------------------------|
| Classical cannabinoids     | Similar to THC                                                          | HU-210; HU211; AM-906; AM-411                                        |
| Non-classical cannabinoids | Cyclohexylphenols                                                       | CP compounds: CP-47,497 and analogues;                               |
| Hybrid cannabinoids        | Share similarities with classical and non-classical cannabinoids        | AM-4030                                                              |
| Aminoalkylindoles          | Assimilar to THC                                                        | WIN 55,212-2; AM-1241, UR-144, 5F-APICA; compounds of the JWH family |
| Eicosanoids                | Structures analogous to endocannabinoids                                | methanandamide                                                       |
| Others                     | Other structures; Diapyrazoles, naphthylpyrroles and naphthylmethylenes | SR141716A; SR144528                                                  |

**Table S5.** Phencyclidine-type substances

| <b>Abbreviation<br/>(common name)</b> | <b>Chemical name</b>                                |
|---------------------------------------|-----------------------------------------------------|
| Ketamine                              | 2-(2-Chlorophenyl)-2-(methylamino)cyclohexan-1-one  |
| PCA                                   | 1-Phenylcyclohexan-1-amine                          |
| PCP (phencyclidine)                   | 1-(1-phencyclohexyl) piperidine                     |
| PCE (eticyclidine)                    | <i>N</i> -ethyl-1-phenylcyclohexylamine             |
| PCPr                                  | <i>N</i> -Propyl-1-phenylcyclohexylamine            |
| PCiP                                  | 1-Phenyl- <i>N</i> -(propan-2-yl)cyclohexan-1-amine |
| PCPy, PHP (rolicyclidine)             | 1-(1-phenylcyclohexyl) pyrrolidine                  |
| PCMo                                  | 1-(1-Phenylcyclohexyl)morpholine                    |
| TCP (tenocyclidine)                   | 1-[1-(thiophen-2-yl)cyclohexyl]piperidine           |
| TCPy                                  | 1-[1-(Thiophen-2-yl)cyclohexyl]pyrrolidine          |
| 2-MeO-PCP                             | 2-methoxy-phencyclidine                             |
| 3-OH-PCP (3-hydroxyphencyclidine)     | 3-[1-(Piperidin-1-yl)cyclohexyl]phenol              |
| 3-OH-PCE                              | 3-[1-(Ethylamino)cyclohexyl]phenol                  |
| 3-MeO-PCE (methoxieticyclidine)       | 2-(3-methoxyphenyl)-2-(ethylamino)cyclohexane       |
| 3-MeO-PCP (3-methoxyphencyclidine)    | 1-[1-(3-methoxyphenyl)cyclohexyl]piperidine         |
| 3-MeO-PCPy (3-methoxyrolicyclidine)   | 1-[1-(3-Methoxyphenyl)cyclohexyl]-pyrrolidine       |
| 3-MeO-PCPr                            | 2-(3-Methoxyphenyl)-2-(propylamino)cyclohexane      |
| 4-Me-PCP                              | 1-[1-(4-Methylphenyl)cyclohexyl]piperidine          |
| 4'-Me-PCP                             | 4-Methyl-1-(1-phenylcyclohexyl)piperidine           |
| 4-MeO-PCP (methoxydine)               | 1-[1-(4-methoxyphenyl)cyclohexyl]piperidine         |
| 5-MeO-PCP (5-methophencyclidine)      | 1-[1-(5-methoxyphenyl)cyclohexyl]piperidine         |
| MXE (methoxetamine)                   | 2-(3-Methoxyphenyl)-2-(ethylamino)cyclohexan-1-one  |

**Table S6.** Case report intoxications with phencyclidine-type substances.

| Age/sex                              | Via administration                                                              | of Case report | Detected compound                                                                                                    | Quantity                                                                                                | Symptoms                                                                                                                                                                                                                            | Reference |
|--------------------------------------|---------------------------------------------------------------------------------|----------------|----------------------------------------------------------------------------------------------------------------------|---------------------------------------------------------------------------------------------------------|-------------------------------------------------------------------------------------------------------------------------------------------------------------------------------------------------------------------------------------|-----------|
| 126 patients, median age of 22 years | >50% nasally and oral                                                           | Non-fatal      | Mostly just Ketamine, but in other cases co-ingested alcohol (10.3 %), ecstasy (6.4 %), and methamphetamine (6.0 %). | Not mentioned                                                                                           | The most common symptoms were hypertension and tachycardia. Other symptoms were nausea or vomiting, dysuria, abdominal tenderness, abnormal LFTs, dilatation of the CBD, cystitis, chronic abdominal pain and psychiatric concerns. | [10]      |
| 17, male                             | Nasally                                                                         | Non-fatal      | MXE                                                                                                                  | Not mentioned                                                                                           | Reduced level of consciousness, severe truncal ataxia, dysarthria, dysdiadochokinesis, incoordination and horizontal nystagmus.                                                                                                     | [11]      |
| 45, male                             | Oral                                                                            | Non-fatal      | 4-MeO-PCP and ethanol                                                                                                | Not mentioned                                                                                           | Disorientation, hypersalivation, tremors and occasional myoclonic jerks, scanning speech with dysarthria, and nystagmus in all directions of lateral gaze                                                                           | [12]      |
| 54, male                             | Oral                                                                            | Fatal          | 4-MeO-PCP and 4-HO-MET                                                                                               | Blood-<br>ng/mL<br>Urine-140 mg/L<br>Gastric contents-<br>280 mg                                        | 8,200<br>Not mentioned                                                                                                                                                                                                              | [12]      |
| 17, male                             | 1 <sup>o</sup> time:<br>Oral 200 mg<br><br>2 <sup>o</sup> time:<br>Nasally 50mg | Non-fatal      | 3-MeO-PCP                                                                                                            | 1 <sup>o</sup> time:<br>Blood-71.1 ng/mL<br>Urine-706 ng/L<br><br>2 <sup>o</sup> time:<br>Not mentioned | Hypertension, tachycardia and neurological manifestations such as confusion, hypertonia, nystagmus and agitation                                                                                                                    | [13]      |
| 29, male                             | Not mentioned                                                                   | Fatal          | 3-MeO-PCP                                                                                                            | 139 ng/mL of 3-MeO-PCP, with 4.1 mg/L of                                                                | Congested lungs and distended bladder                                                                                                                                                                                               | [12]      |



## References

1. Gee, P.; Richardson, S.; Woltersdorf, W.; Moore, G. Toxic effects of BZP-based herbal party pills in humans: A prospective study in Christchurch, New Zealand. *N. Z. Med. J.* **2005**, *118*, 1–10.
2. Alansari, M.; Hamilton, D. Nephrotoxicity of BZP-based herbal party pills: a New Zealand case report. *N. Z. Med. J.* **2006**, *119*, 1–3.
3. Wood, D.M.; Button, J.; Lidder, S.; Ramsey, J.; Holt, D.W.; Dargan, P.I. Dissociative and sympathomimetic toxicity associated with recreational use of 1-(3-trifluoromethylphenyl) piperazine (TFMPP) and 1-benzylpiperzine (BZP). *J. Med. Toxicol.* **2008**, *4*, 254–257.
4. Gee, P.; Jerram, T.; Bowie, D. Multiorgan failure from 1-benzylpiperazine ingestion legal high or lethal high. *Clin. Toxicol.* **2010**, *48*, 230–233.
5. Austin, H.; Monasterio, E. Acute psychosis following ingestion of ‘Rapture.’ *Australas. Psychiatry* **2015**, *12*, 406–408.
6. Balmelli, C.; Kupferschmidt, H.; Rentsch, K.; Schneemann, M. Tödliches hirnödem nach einnahme von ecstasy und benzylpiperazin. *Dtsch. Medizinische Wochenschrift* **2001**, *126*, 809–811.
7. Kovaleva, J.; Ir, E.D.; Paepe, P. De; Verstraete, A. Acute chlorophenylpiperazine overdose: A case report and review of the literature. *Ther. Drug Monit.* **2008**, *30*, 394–398.
8. Gee, P.; Gilbert, M.; Richardson, S.; Moore, G.; Paterson, S.; Graham, P. Toxicity from the recreational use of 1-benzylpiperazine. *Clin. Toxicol.* **2008**, *46*, 802–807.
9. Elliott, S. Current awareness of piperazines: pharmacology and toxicology. *Drug Test. Anal.* **2011**, *3*, 430–438.
10. Ho, J.H.; Dargan, P.I. Arylcyclohexamines (Ketamine, Phencyclidine, and Analogues). In *Critical Care Toxicology*; Springer International Publishing: Cham, 2016; pp. 1–46.
11. Shields, J.E.; Dargan, P.I.; Wood, D.M.; Puchnaewicz, M.; Davies, S.; Waring, W.S. Methoxetamine associated reversible cerebellar toxicity: Three cases with analytical confirmation. *Clin. Toxicol.* **2012**, *50*, 438–440.
12. Wallach, J.; Brandt, S.D. Phencyclidine-based new psychoactive substances. In *Handbook of Experimental Pharmacology*; Springer, Cham, 2018; Vol. 252, pp. 261–303.
13. Berar, A.; Allain, J.-S.; Allard, S.; Lefevre, C.; Baert, A.; Morel, I.; Bouvet, R.; Gicquel, T. Intoxication with 3-MeO-PCP alone. *Medicine (Baltimore)*. **2019**, *98*, e18295.
